# Supplementary material for: Hydrothermal activity lowers trophic diversity in Antarctic hydrothermal sediments
Source: Copernicus journal article supplement (doi:10.5194/bg-14-5705-2017), 2017-12-20
Supplement: Supplementary file 1 [file bg-14-5705-2017-supplement.zip]

Archive with 7 entries (7 files):
- BELL et al_bg2016318_supplementary.docx
- SuppFigS3.pdf
- Supplementary FigS1.pdf
- SuppS2.xlsx
- bg-14-5705-2017-supplement-title-page.pdf
- Supplementary FigS2.pdf
- SuppS1.xlsx
