# Supplementary material for: Hydrothermal activity lowers trophic diversity in Antarctic hydrothermal sediments
Source: Copernicus journal article supplement (doi:10.5194/bg-14-5705-2017), 2017-12-20
Supplement: Supplementary file 1 [file bg-14-5705-2017-supplement.zip › bg-14-5705-2017-supplement-title-page.pdf]

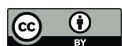

## *Supplement of*

# **Hydrothermal activity lowers trophic diversity in Antarctic hydrothermal sediments**

**James B. Bell et al.**

*Correspondence to:* Clare Woulds (c.woulds@leeds.ac.uk)

- [bg-14-5705-2017-supplement-title-page.pdf](#)
- [BELL et al\\_bg2016318\\_supplementary.docx](#)
- [SuppFigS3.pdf](#)
- [SuppS1.xlsx](#)
- [SuppS2.xlsx](#)
- [Supplementary FigS1.pdf](#)
- [Supplementary FigS2.pdf](#)

The copyright of individual parts of the supplement might differ from the CC BY 4.0 License.
