# Supplementary figures and images for: Hydrothermal activity lowers trophic diversity in Antarctic hydrothermal sediments
Source: Copernicus journal article supplement (doi:10.5194/bg-14-5705-2017), 2017-12-20

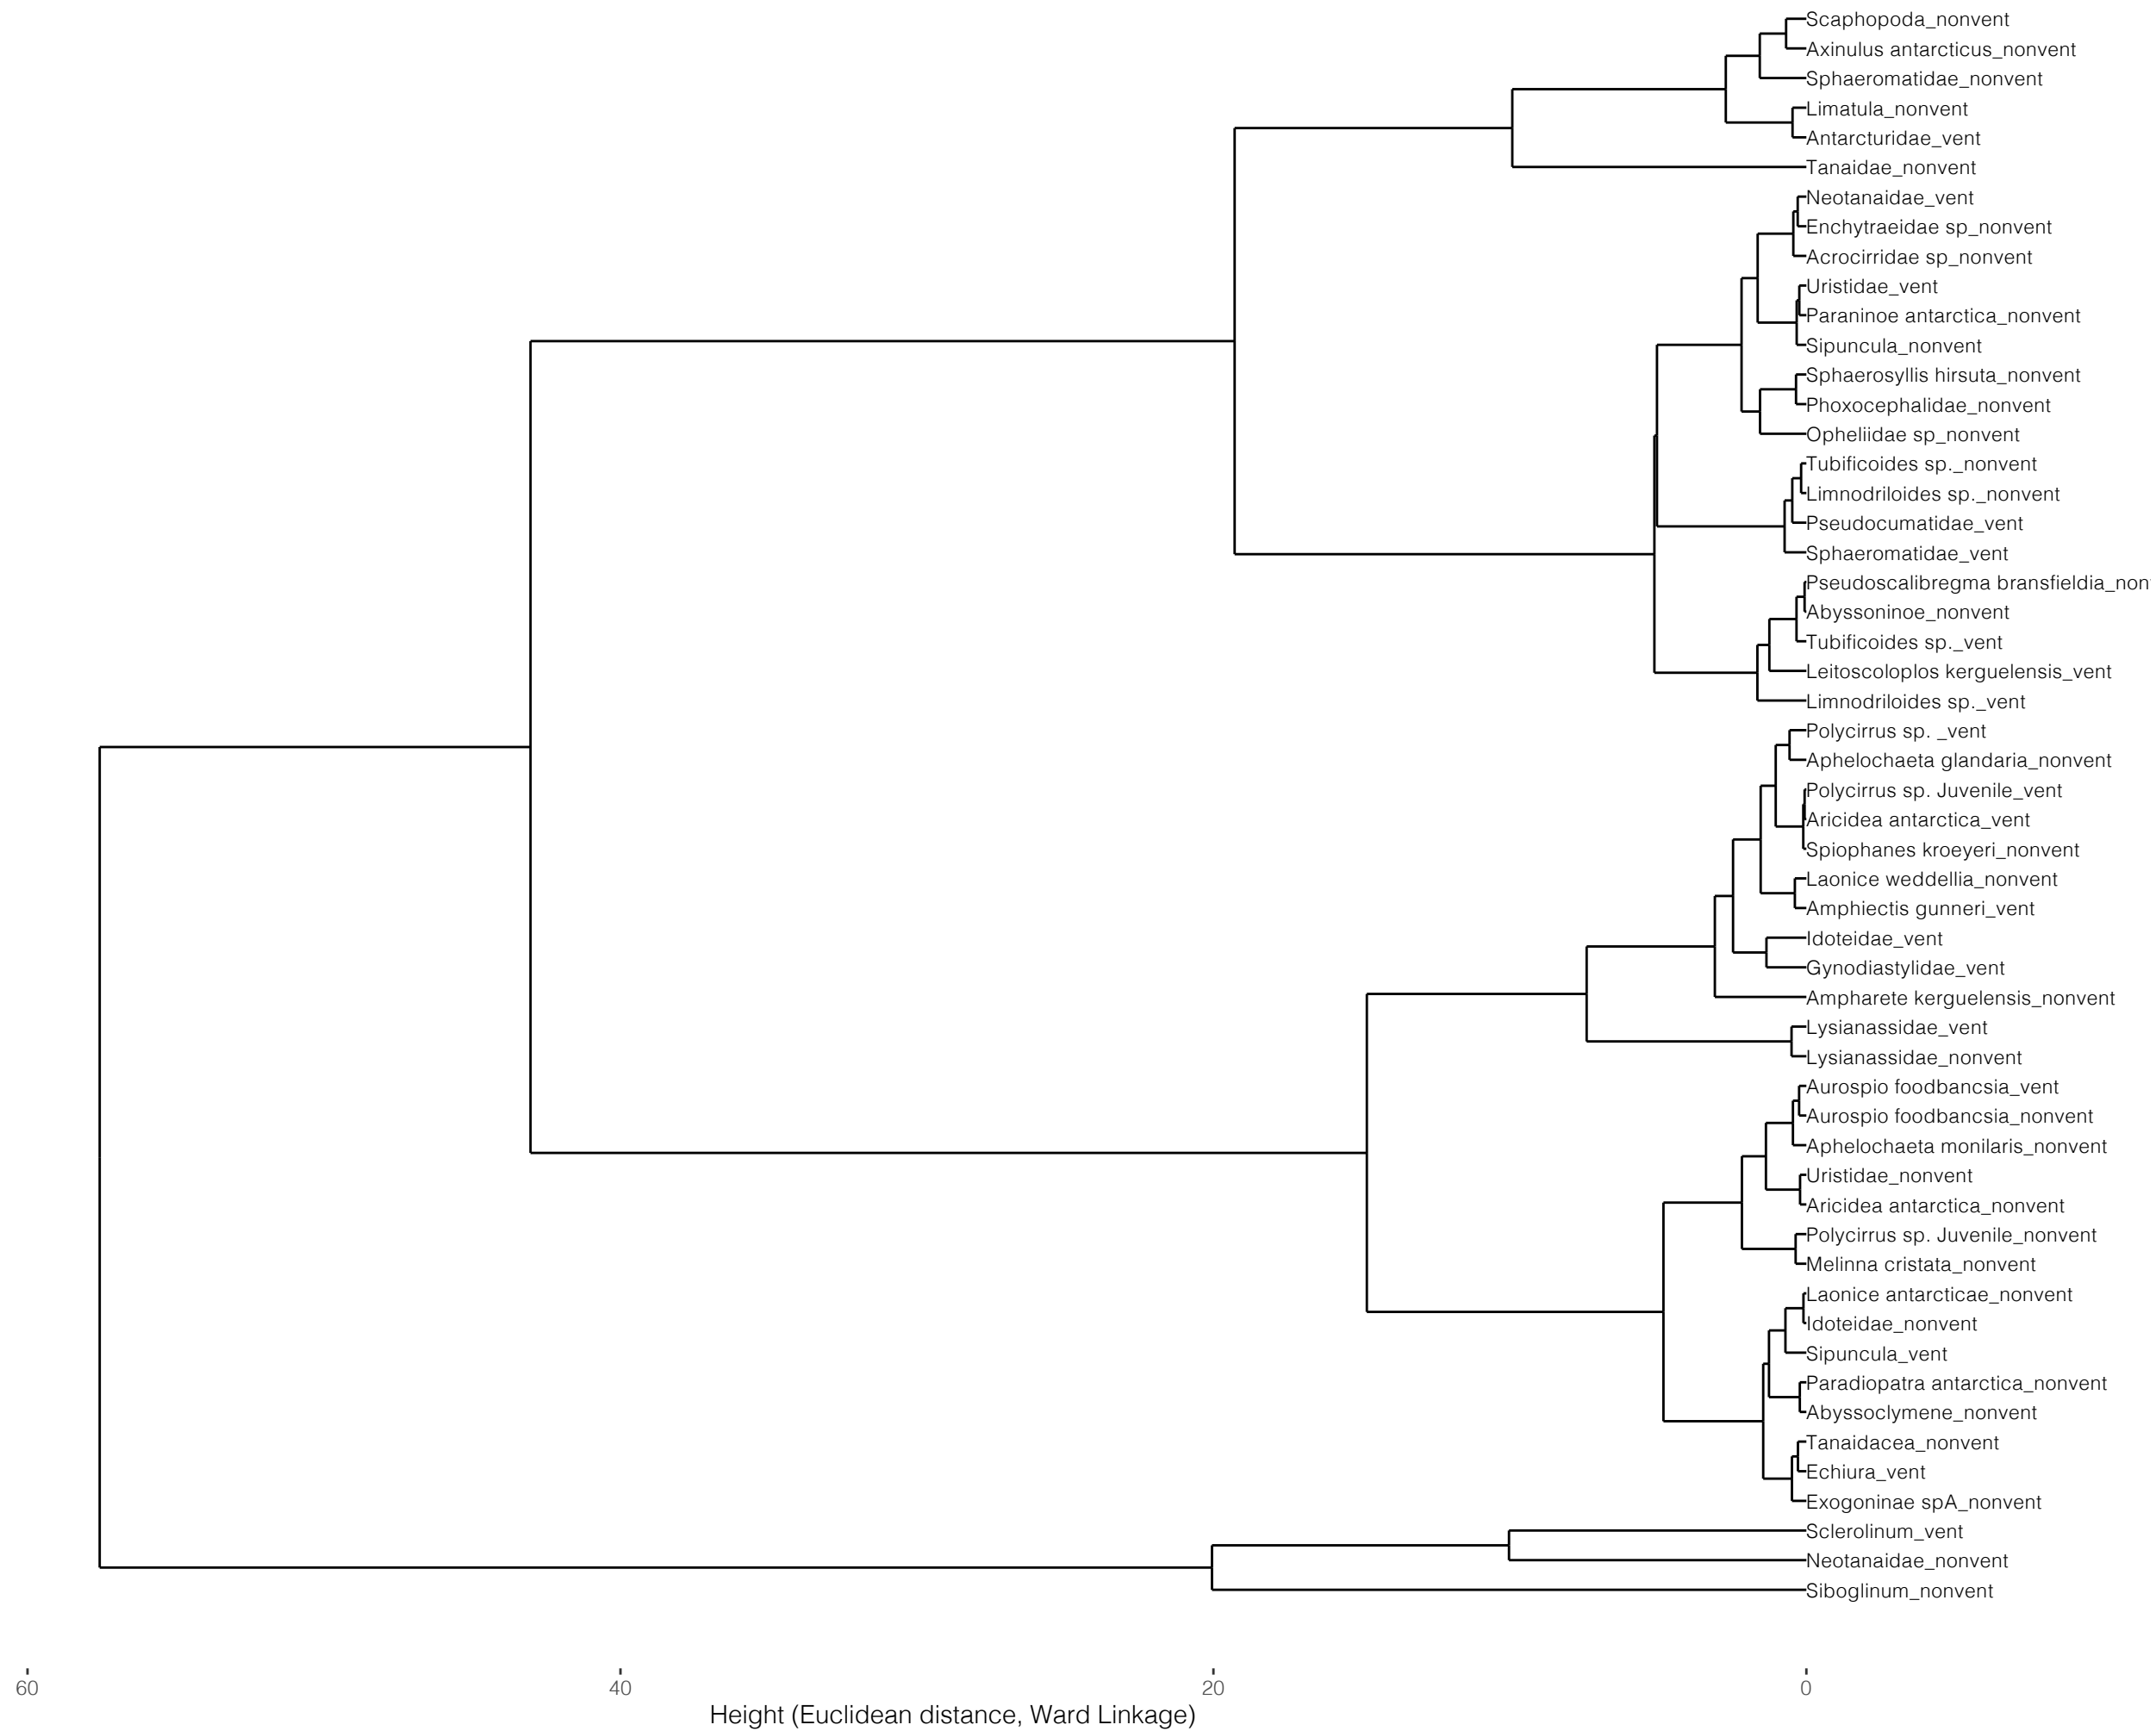

Supplement: Supplementary file 1 [file bg-14-5705-2017-supplement.zip › SuppFigS3.pdf]

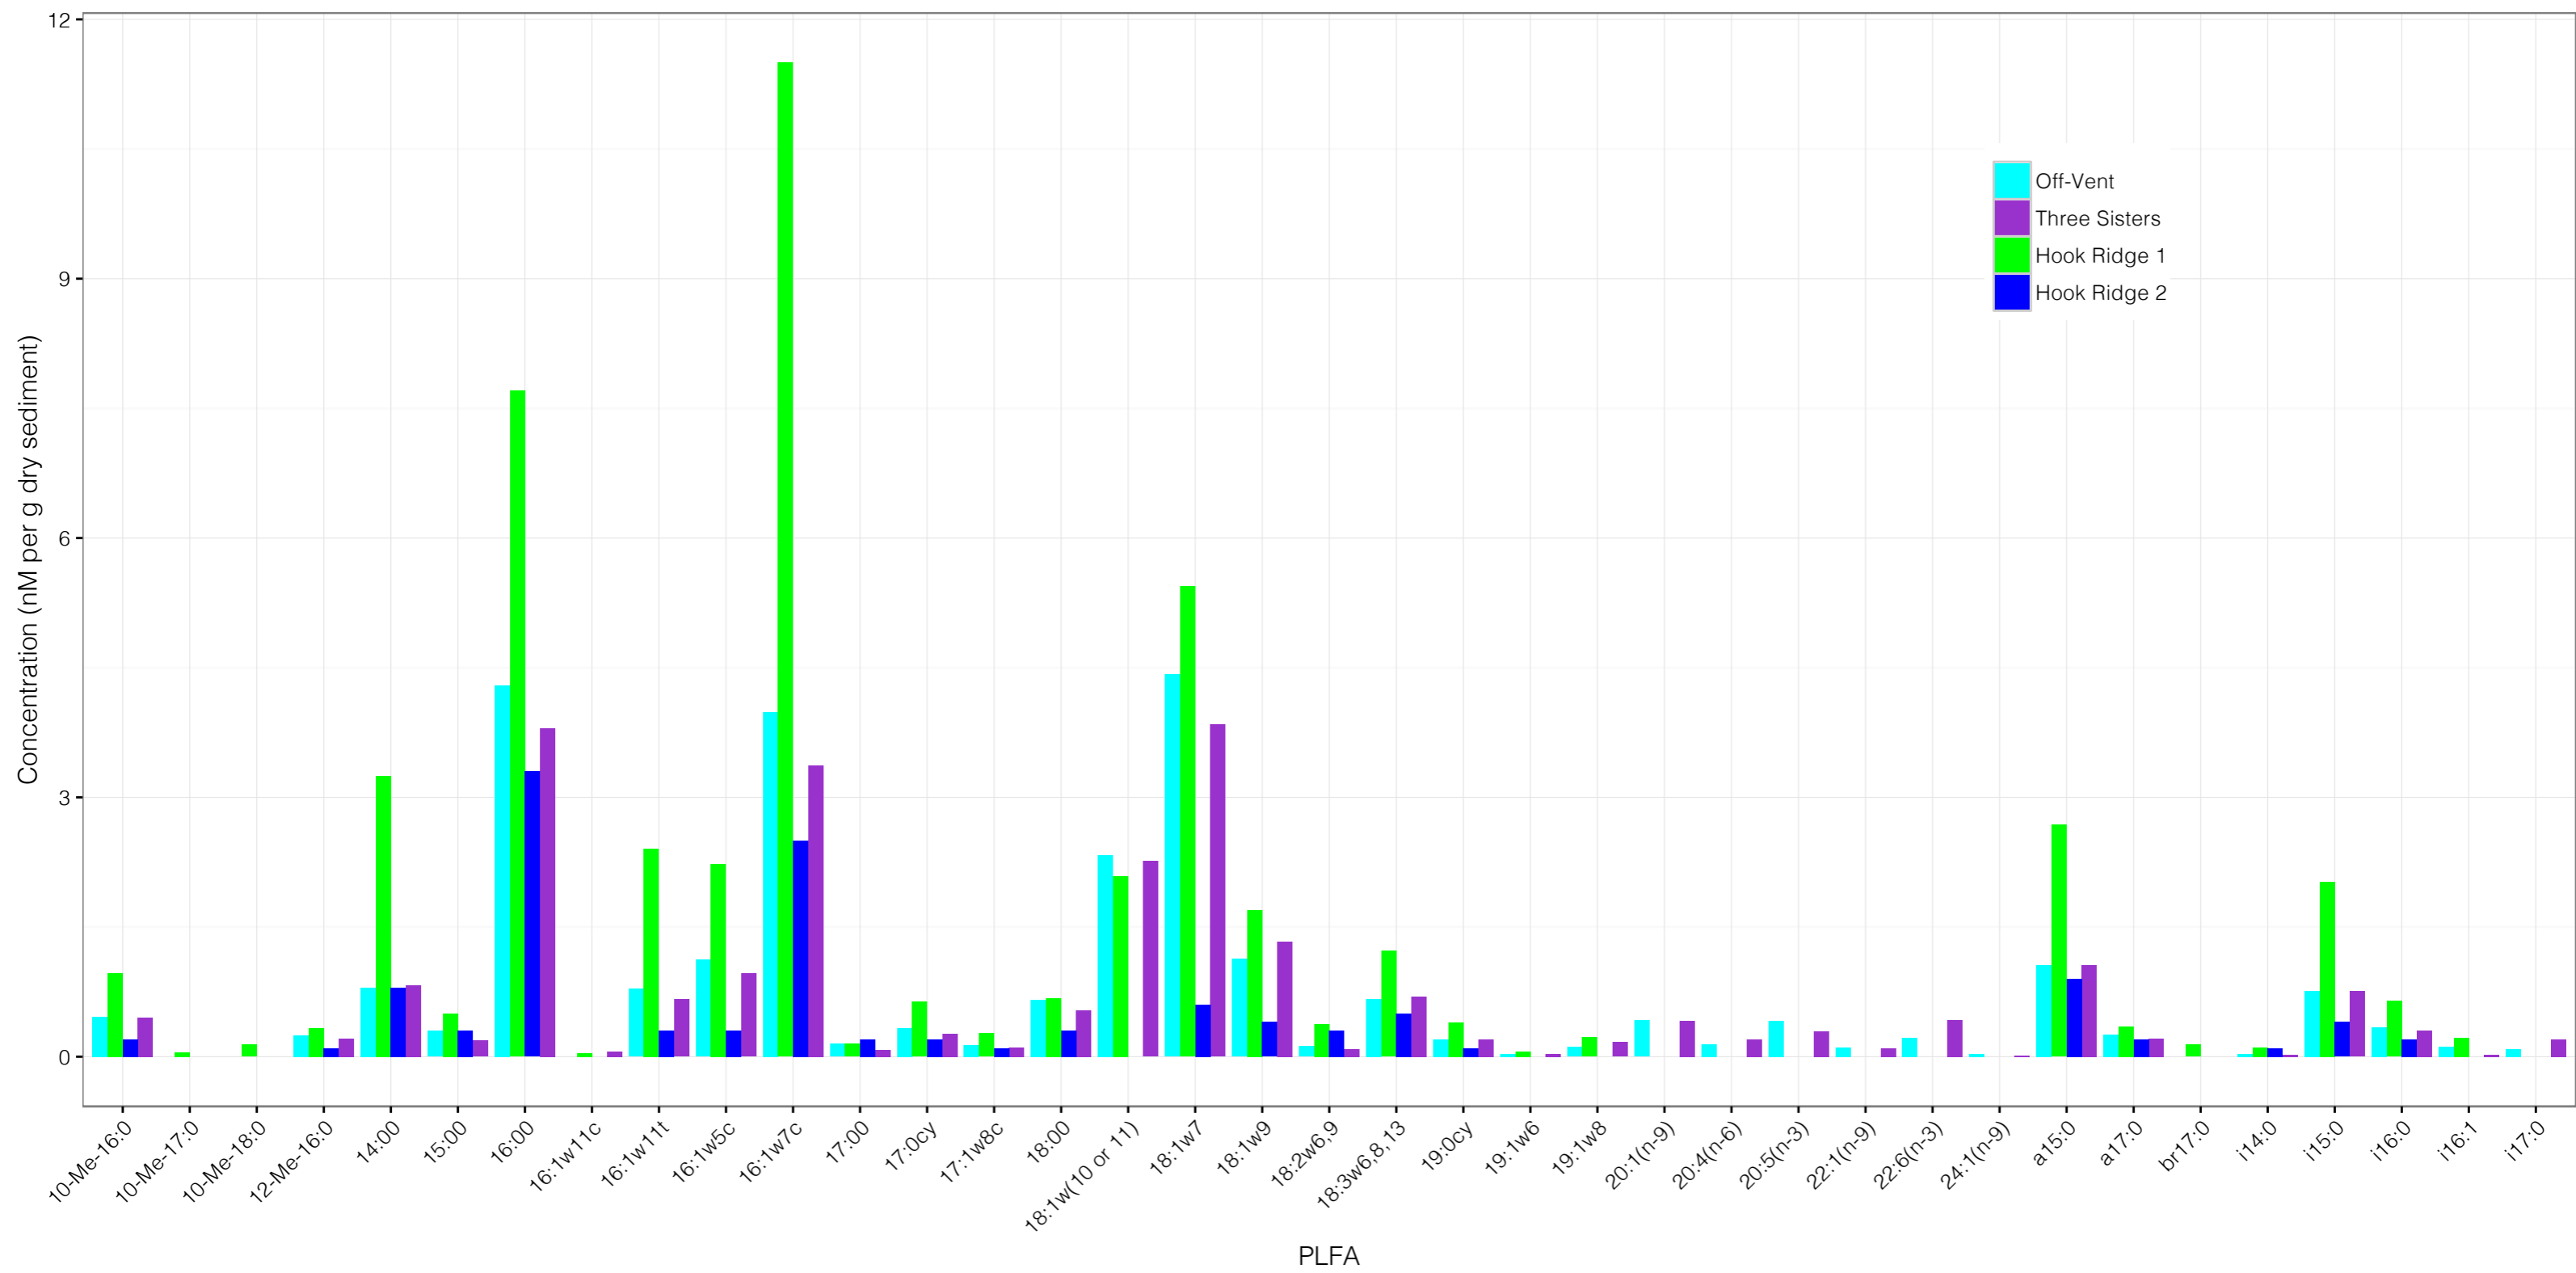

Supplement: Supplementary file 1 [file bg-14-5705-2017-supplement.zip › Supplementary FigS1.pdf]

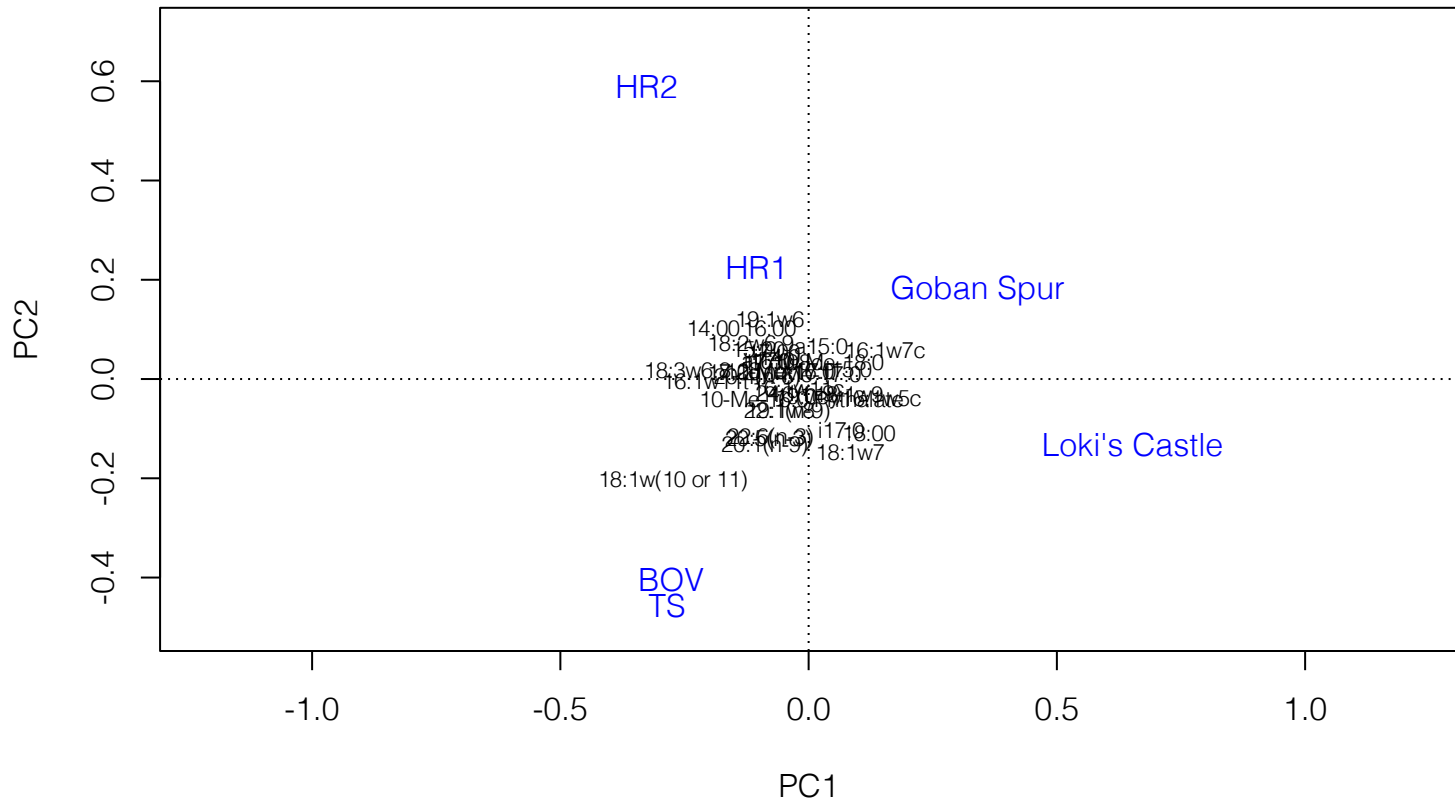

Supplement: Supplementary file 1 [file bg-14-5705-2017-supplement.zip › Supplementary FigS2.pdf]
